# Supplementary material for: Enhancing free choice masked priming via switch trials during repeated practice
Source: Front Psychol. 2022 Sep 8;13:927234. doi: 10.3389/fpsyg.2022.927234 (PMC9493449; doi:10.3389/fpsyg.2022.927234)
Supplement: Supplementary file 1 [file Data_Sheet_1.XLSX]

## Sheet: Sheet1
	Free choice										Forced choice												pre prime visibility test	post prime visibility test
		Reaction time in pre-test			Reaction time in post-test			Congruent rate			Reaction time in pre-test			Reaction time in post-test			Error rate in pre test			Error rate in post test
		Congruent	Incongruent	Neutral	Congruent	Incongruent	Neutral	pre-test	post-test	post minus pre	Congruent	Incongruent	Neutral	Congruent	Incongruent	Neutral	Congruent	Incongruent	difference	Congruent	Incongruent	difference
Exp.1	sub1	406.8	448.4	400.68	325.1	347	338.4	0.59	0.79	0.2	380.461	417.305	407.42	326.225	373.892	335.57	0	0	0	0	0.0111111	0.0111111	0.333333	0.333333
	sub2	519	501	510.04	397	415.4	402.74	0.49	0.57	0.08	484.547	527.577	485.858	390.619	417.106	399.484	0.0444444	0.0888889	0.0444444	0.0888889	0.222222	0.133333	0.35	0.316667
	sub3	372.3	398.5	391.72	368.8	396.7	376.01	0.68	0.76	0.08	365.184	387.223	374.845	383.209	404.714	383.193	0.0777778	0.0444444	-0.0333333	0.1	0.0888889	-0.0111111	0.3	0.35
	sub4	417.7	461.5	438.48	379.7	381.8	383.83	0.56	0.59	0.03	433.122	451.211	449.435	395.093	410.286	399.433	0.0555556	0.133333	0.0777778	0.0111111	0.0555556	0.0444444	0.316667	0.366667
	sub5	352.3	409	358.03	336.3	366.7	343.08	0.65	0.67	0.02	320.309	372.344	337.383	335.982	373.131	335.551	0.0333333	0.0666667	0.0333333	0.0333333	0.144444	0.111111	0.383333	0.416667
	sub6	367.4	420.6	383.81	344.6	394.5	360.63	0.58	0.65	0.07	374.088	411.824	399.339	365.628	392.265	378.792	0	0.0111111	0.0111111	0	0.0777778	0.0777778	0.316667	0.233333
	sub7	502	509.4	490.03	455.4	469.1	481.63	0.51	0.67	0.16	478.487	503.911	476.149	446.569	483.712	453.428	0.0222222	0.0222222	0	0	0.0111111	0.0111111	0.266667	0.35
	sub8	309.2	316.3	324.45	333.9	356.4	340.13	0.62	0.68	0.06	315.075	341.509	328.287	344.853	372.736	351.779	0.0555556	0.0444444	-0.0111111	0.122222	0.111111	-0.0111111	0.35	0.25
	sub9	442.4	494.9	448.1	364.9	408.4	389.5	0.57	0.63	0.06	418.23	437.846	420.892	400.463	419.526	395.355	0.0555556	0.0777778	0.0222222	0.0222222	0.222222	0.2	0.233333	0.333333
	sub10	502.2	517.7	526.7	404.3	438.9	408.4	0.55	0.64	0.09	473.88	481.116	465.658	399.345	434.431	416.492	0.111111	0.168539	0.0574282	0.0777778	0.133333	0.0555556	0.383333	0.35
	sub11	423.8	464.4	436.3	381.4	411.7	387.7	0.61	0.56	-0.05	446.757	451.235	458.508	385.883	414.259	399.831	0.0555556	0.123596	0.06804	0.0674157	0.179775	0.11236	0.35	0.233333
	sub12	479.1	480.4	472.9	474.7	488.5	492.4	0.56	0.61	0.05	461.886	475.203	459.236	423.491	456.961	436.539	0	0.0222222	0.0222222	0	0.0555556	0.0555556	0.316667	0.3
	sub13	470.4	490.6	490	409.8	445.8	414.6	0.65	0.74	0.09	432.707	447.333	467.53	405.562	471.403	420.036	0.0337079	0.144444	0.110737	0.1	0.222222	0.122222	0.3	0.316667
	sub14	455.6	510.2	449.2	417.5	417.9	424.3	0.55	0.62	0.07	454.357	465.296	421.944	409.437	429.584	412.374	0.0227273	0.0555556	0.0328283	0.0555556	0.255556	0.2	0.4	0.283333
	sub15	393.9	396.8	399	346.4	353.8	348.8	0.62	0.69	0.07	397.556	408.363	400.341	374.297	396.642	375.139	0	0.0555556	0.0555556	0.0555556	0.111111	0.0555556	0.35	0.316667
Exp.2	sub16	696.9	723.7	729.2	611.2	668.9	640.6	0.66	0.56	-0.1	587.305	614.739	616.153	480.849	531.979	493.857	0	0.0444444	0.0444444	0.0333333	0.166667	0.133333	0.333333	0.35
	sub17	430	496	465.6	327.7	367.7	348.1	0.59	0.7	0.11	388.452	433.852	408.218	325.189	359.895	344.543	0.0222222	0.0444444	0.0222222	0.0666667	0.0888889	0.0222222	0.366667	0.266667
	sub18	468.5	478.9	454.2	379.1	386.9	365.4	0.54	0.59	0.05	426.392	461.84	466.801	366.895	406.624	398.192	0.0888889	0.211111	0.122222	0.0222222	0.177778	0.155556	0.333333	0.35
	sub19	478.5	486.8	487.9	484.4	506.6	496.3	0.54	0.57	0.03	462.272	472.343	463.73	455.802	477.666	472.683	0	0.0555556	0.0555556	0.0666667	0.111111	0.0444444	0.283333	0.233333
	sub20	405.2	411	405.6	416.4	429.3	432	0.59	0.52	-0.07	391.996	433.082	408.954	413.658	428.374	399.14	0.0333333	0.244444	0.211111	0.0222222	0.0888889	0.0666667	0.283333	0.4
	sub21	487	547.4	543	406.7	426.8	411.7	0.54	0.59	0.05	439.666	484.364	466.563	417.053	438.046	419.108	0.0111111	0.0666667	0.0555556	0.0111111	0.0555556	0.0444444	0.333333	0.333333
	sub22	511.3	530.1	521.5	459.9	477.9	470.8	0.54	0.58	0.04	442.825	473.165	451.307	428.576	453.99	439.891	0.0555556	0.0666667	0.0111111	0.0444444	0.0222222	-0.0222222	0.4	0.333333
	sub23	471.8	477.9	475.8	369.6	408	389.6	0.58	0.62	0.04	414.282	436.133	410.324	363.248	374.12	380.902	0.122222	0.172222	0.05	0.0222222	0.0611111	0.0388889	0.283333	0.333333
	sub24	372.7	392.8	376.3	358.6	372.2	356.3	0.63	0.69	0.06	370.337	395.307	375.56	367.228	375.218	354.803	0.166667	0.133333	-0.0333333	0.1	0.166667	0.0666667	0.283333	0.4
	sub25	377.1	396.9	391.5	364	385.3	380.7	0.67	0.67	0	378.12	393.662	394.47	355.698	390.392	381.49	0	0.0337079	0.0337079	0	0.0222222	0.0222222	0.35	0.316667
	sub26	525.3	647.4	532.9	439.8	450.8	434.6	0.57	0.55	-0.02	479.215	493.965	500.818	453.274	483.485	468.171	0.0681818	0.0555556	-0.0126263	0.0337079	0.155556	0.121848	0.333333	0.283333
	sub27	457.7	492.2	443.8	447.8	480.6	457.9	0.56	0.56	0	414.515	422.168	423.201	426.474	433.667	420.224	0.0444444	0.133333	0.0888889	0.011236	0.0444444	0.0332085	0.383333	0.166667
	sub28	426.6	475	434.5	354.8	366.2	357	0.57	0.64	0.07	408.385	449.943	430.015	361.621	384.509	359.642	0.0222222	0.123596	0.101373	0.0449438	0.0909091	0.0459653	0.283333	0.433333
	sub29	492.1	518.5	523.7	373	371.8	377.1	0.57	0.63	0.06	485.454	502.264	475.849	453.384	469.437	464.255	0.0705882	0.0898876	0.0192994	0.0113636	0.0777778	0.0664141	0.383333	0.4
	sub30	469.6	502.8	494.5	441.6	476.9	432.3	0.64	0.6	-0.04	459.659	472.741	473.483	367.651	408.954	399.343	0.0555556	0.0555556	0	0.0111111	0.1	0.0888889	0.333333	0.316667
Exp.3	sub31	483.51	531.49	490.77	427.84	455.8	451.82	0.52	0.51	-0.01	451.298	468.71	467.187	412.143	444.807	440.133	0.0229885	0.0114943	-0.0114943	0.0227273	0.0470588	0.0243316	0.333333	0.333333
	sub32	410.99	484.27	448	396.95	455.3	435.73	0.57	0.61	0.04	401.655	395.599	404.39	391.243	405.089	405.522	0.0898876	0.244444	0.154557	0.0666667	0.166667	0.1	0.35	0.316667
	sub33	406.23	444.22	417.94	432.91	442.8	430.65	0.59	0.59	0	412.856	416.216	425.986	435.184	459.004	444.737	0.0114943	0.133333	0.121839	0.045977	0.0804598	0.0344828	0.3	0.35
	sub34	490.25	510.68	493.47	451.43	482.8	451.42	0.52	0.66	0.14	455.313	461.926	468.266	435.007	454.829	439.602	0.0344828	0.0229885	-0.0114943	0.0555556	0.0333333	-0.0222222	0.316667	0.366667
	sub35	434.84	452.9	438.14	419.65	417.7	406.23	0.58	0.51	-0.07	400.332	413.345	418.889	402.069	422.605	404.638	0.0444444	0.0777778	0.0333333	0.0114943	0.0229885	0.0114943	0.383333	0.416667
	sub36	423.74	475.2	456.52	496.04	531.6	522.31	0.58	0.63	0.05	393.485	429.57	407.431	505.331	525.61	487.26	0.0555556	0.103448	0.0478927	0.0333333	0.0222222	-0.0111111	0.316667	0.233333
	sub37	467.77	527.33	478.44	358.65	438.5	369.83	0.51	0.61	0.1	482.575	488.365	466.764	370.601	414.38	400.788	0.0444444	0.0337079	-0.0107366	0	0.0804598	0.0804598	0.266667	0.35
	sub38	407.7	430.55	415.41	397.33	433	414.68	0.67	0.67	0	389.861	438.068	400.443	387.911	421.786	402.942	0.0222222	0.0666667	0.0444444	0	0.0444444	0.0444444	0.35	0.25
	sub39	486	492.8	463.8	432	434.3	418.7	0.46	0.46	0	461.363	484.13	464.048	435.319	438.662	433.224	0.0222222	0.0666667	0.0444444	0.011236	0.1	0.088764	0.35	0.366667
	sub40	418.8	443.4	419.2	424.8	442	436.5	0.59	0.54	-0.05	417.594	445.561	417.239	418.502	435.98	442.3	0.0568182	0.0777778	0.0209596	0.0222222	0.0666667	0.0444444	0.366667	0.266667
	sub41	476.1	521	494	414.8	436.2	442.1	0.58	0.59	0.01	442.252	482.304	445.471	413.55	444.565	408.151	0.0222222	0.0898876	0.0676654	0.123596	0.188235	0.0646398	0.316667	0.4
	sub42	466.1	492.8	484.3	389.9	419	404.5	0.69	0.64	-0.05	430.893	462.104	456.354	392.091	435.018	406.545	0.0222222	0.0333333	0.0111111	0.0111111	0.0555556	0.0444444	0.366667	0.366667
	sub43	412.6	482	427.2	380.1	420.6	382.9	0.67	0.71	0.04	394.457	430.213	407.366	369.919	403.361	369.851	0.0444444	0.0555556	0.0111111	0.0222222	0.1	0.0777778	0.483333	0.333333
	sub44	364.3	408	390.7	344.9	381.6	371.9	0.63	0.69	0.06	370.179	391.104	374.461	350.486	393.242	359.042	0.0888889	0.211111	0.122222	0	0.188889	0.188889	0.35	0.333333
	sub45	493.8	519.6	513.5	509.5	549.8	535.4	0.57	0.64	0.07	448.684	470.493	466.08	484.408	502.418	465.699	0.0444444	0.0777778	0.0333333	0.0222222	0.0333333	0.0111111	0.233333	0.283333
Exp.4	sub46	481.5	496.7	489.3	432.9	446.3	430.2	0.51	0.53	0.02	446.574	491.313	464.27	432.898	446.347	430.197	0.0222222	0.0222222	0	0.0222222	0.0555556	0.0333333	0.316667	0.416667
	sub47	418.3	470.2	443.4	354	388.5	373	0.66	0.61	-0.05	408.364	434.471	431.347	371.037	396.608	376.364	0.0222222	0.0666667	0.0444444	0.111111	0.111111	-1.11022e-16	0.333333	0.3
	sub48	464.3	496.5	477.5	442.2	480.7	459.4	0.54	0.64	0.1	437.065	471.951	458.381	438.486	479.607	453.193	0.0111111	0.0333333	0.0222222	0.0111111	0.0555556	0.0444444	0.35	0.366667
	sub49	638.8	622.3	639.3	414.2	461	426.6	0.56	0.53	-0.03	550.986	582.309	575.328	402.366	443.326	427.269	0.0111111	0	-0.0111111	0	0.0111111	0.0111111	0.316667	0.266667
	sub50	354.9	379.2	353.8	348.9	379.6	354	0.62	0.62	0	353.139	377.846	355.684	348.867	403.265	357.618	0.0555556	0.111111	0.0555556	0.0666667	0.144444	0.0777778	0.35	0.333333
	sub51	398.7	441.6	412.5	335.1	349	339.9	0.59	0.57	-0.02	381.378	403.089	393.046	356.268	358.518	346.791	0.0111111	0.0777778	0.0666667	0.111111	0.144444	0.0333333	0.3	0.283333
	sub52	442.6	466.8	448.4	398.4	384	397.3	0.61	0.6	-0.01	421.855	428.84	424.843	395.762	411.685	403.248	0.0333333	0.0333333	0	0.0111111	0.0222222	0.0111111	0.316667	0.316667
	sub53	448.7	475.8	450.2	369.8	407	391.2	0.57	0.62	0.05	405.879	420.059	395.626	370.48	401.448	383.099	0.0222222	0.0444444	0.0222222	0	0.0777778	0.0777778	0.3	0.316667
	sub54	483.1	473.3	471.6	501.7	527.9	498	0.54	0.61	0.07	468.684	468.678	475.249	468.972	516.58	499.657	0.0111111	0.0674157	0.0563046	0	0.0666667	0.0666667	0.3	0.366667
	sub55	350.4	364.3	359.4	307	328.1	327	0.68	0.79	0.11	332.213	370.722	352.499	307.788	342.438	323.386	0.0111111	0.144444	0.133333	0.0666667	0.0555556	-0.0111111	0.416667	0.283333
	sub56	405	425.4	412.1	398.3	437.9	387.3	0.77	0.61	-0.16	404.446	438.993	395.048	389.768	435.99	419.535	0.0444444	0.122222	0.0777778	0.0444444	0.0888889	0.0444444	0.3	0.366667
	sub57	470.5	530.7	475.9	367.9	408.9	370.3	0.56	0.6	0.04	464.016	465.989	462.677	411.928	419.537	400.248	0.0561798	0.0898876	0.0337079	0.0111111	0.133333	0.122222	0.333333	0.333333
	sub58	495	528.5	518.4	358.2	397.9	378.3	0.65	0.67	0.02	455.467	453.693	462.168	358.989	376.443	356.001	0.0222222	0.0340909	0.0118687	0.0444444	0.0222222	-0.0222222	0.3	0.35
	sub59	364.1	464.6	391.5	332.3	391.8	349.5	0.72	0.69	-0.03	369.33	417.289	395.746	333.214	389.359	367.377	0.0229885	0.127907	0.104918	0.0444444	0.1	0.0555556	0.366667	0.333333
	sub60	536.7	534.9	520.4	483.3	472.6	473.4	0.49	0.49	0	490.234	504.994	506.932	456.97	467.943	486.502	0	0	0	0.0549451	0.0224719	-0.0324731	0.316667	0.233333
